# Supplementary material for: ROCK2-Specific Inhibitor KD025 Suppresses Adipocyte Differentiation by Inhibiting Casein Kinase 2
Source: MDPI journal article supplement (doi:10.3390/molecules26164747), 2021-08-05
Supplement: s1 [file s1]

## **SUPPLEMENTARY DATA**

### **ROCK2-specific inhibitor KD025 suppresses adipocyte differentiation by inhibiting casein kinase 2**

**Nhu Nguyen Quynh Tran, Kwang-Hoon Chun<sup>\*</sup>**

*Gachon Institute of Pharmaceutical Sciences, College of Pharmacy, Gachon University,  
Incheon 21936, Republic of Korea*

# Correspondence to:

**Kwang-Hoon Chun, Ph.D.**

Gachon Institute of Pharmaceutical Sciences, College of Pharmacy, Gachon University, Incheon 21936, Republic of Korea

Tel.: 82-32-820-4951

E-mail address: khchun@gachon.ac.kr

# Supplemental Figures

(A)

| NW Score |     | Identities    |                                                            | Positives                     |     | Gaps       |  |
|----------|-----|---------------|------------------------------------------------------------|-------------------------------|-----|------------|--|
| 1306     |     | 242/263 (92%) |                                                            | 255/263 (96%)                 |     | 0/263 (0%) |  |
| ROCK1    | 76  | YE            | VVKVIGRGAFGEVQLVRHKSTRKVYAMKLLSKFEMIKRSDSAFFWEERDIMAFA     | NSPW                          | 135 |            |  |
| ROCK2    | 92  | YD            | VVKVIGRGAFGEVQLVRHKASQKVYAMKLLSKFEMIKRSDSAFFWEERDIMAFA     | NSPW                          | 151 |            |  |
| ROCK1    | 136 | VV            | QLFYAFQDDRYLYMVMEYMPGGDLVNLMNSNYDVPEKWARFYTA               | EVVLA                         | 195 |            |  |
| ROCK2    | 152 | VV            | QLFYAFQDDRYLYMVMEYMPGGDLVNLMNSNYDVPEKWA+FYTA               | EVVLA                         | 211 |            |  |
| ROCK1    | 196 | HR            | DKVDPNMLLDKSGHLKLADFGTCMKMKEGMVRC                          | DTAVGTPDYISPEVLKSQGGDGY       | 255 |            |  |
| ROCK2    | 212 | HR            | DKVDPNMLLDKSGHLKLADFGTCMKMDE                               | TGMVHCDTAVGTPDYISPEVLKSQGGDGY | 271 |            |  |
| ROCK1    | 256 | GRE           | CDWWSVGVFLEYEMLVGDTPFYADSLVGTYSKIMNHKNSLTFPDDNDISKEAKNLICA | 315                           |     |            |  |
| ROCK2    | 272 | GRE           | CDWWSVGVFLEYEMLVGDTPFYADSLVGTYSKIM+HKNSLFP+D+ISKAKNLICA    | 331                           |     |            |  |
| ROCK1    | 316 | FL            | TDREVLGRNGVEEIKRHLFF                                       | 338                           |     |            |  |
| ROCK2    | 332 | FL            | TDREVLGRNGVEEIRQHPPF                                       | 354                           |     |            |  |

(B)

| NW Score |     | Identities    |                                                            | Positives     |  | Gaps       |  |
|----------|-----|---------------|------------------------------------------------------------|---------------|--|------------|--|
| 1381     |     | 253/286 (88%) |                                                            | 271/286 (94%) |  | 0/286 (0%) |  |
| CK2α     | 39  | YQ            | LVRKLGRGKYSEVFEAINITNNEKVVVKILKPVKKKIKREIKILENLRGGPNITLA   | 98            |  |            |  |
| CK2α'    | 40  | YQ            | LVRKLGRGKYSEVFEAINITNNE+VVVKILKPVKKKIKRE+KILENLRGGNII      | 99            |  |            |  |
| CK2α     | 99  | DI            | VPVSRTPALVFEHVNNTDFKQLYQTLTDYDIRFYMYEILKALDYCHSMGIMHRDVK   | 158           |  |            |  |
| CK2α'    | 100 | DI            | VPVSRTPALVFEYINNTDFKQLYQTLTDYDIRFYMYELKALDYCHSGIMHRDVK     | 159           |  |            |  |
| CK2α     | 159 | PH            | NVMIDHEHRKRLRIDWGLAEFYHPGQEYNVRVASRYFKGPELLVDYQMYDYSLDMWSL | 218           |  |            |  |
| CK2α'    | 160 | PH            | NVMIDH+KRLRIDWGLAEFYHPGQEYNVRVASRYFKGPELLVDYQMYDYSLDMWSL   | 219           |  |            |  |
| CK2α     | 219 | GC            | MLASMIFRKEPFFHGHNDYDQLVRIAKVLGTELDYIDKYNIELDPRFNDILGRHSR   | 278           |  |            |  |
| CK2α'    | 220 | GC            | MLASMIFRKEPFFHGHNDYDQLVRIAKVLGTELYGYLKKYHIDLPHFNDILGQHSR   | 279           |  |            |  |
| CK2α     | 279 | KR            | WERFVHSENQHLVSPEALDFDKLLRYDHQSRLTAREAMEHPYF                | 324           |  |            |  |
| CK2α'    | 280 | KR            | WENFIHSENRLVSPEALDLDKLLRYDHQRLTAKEAMEHPYF                  | 325           |  |            |  |

**Figure S1. Pairwise alignment of kinase domains between ROCK1 and ROCK2 (A) and between CK2α and CK2α' (B).** Protein sequences were aligned using NCBI BLAST global alignment tool (<https://blast.ncbi.nlm.nih.gov/>). NCBI protein ID: NP\_005397.1 (ROCK1), NP\_004841.2 (ROCK2), NP\_001886.1 (CK2α), NP\_001887.1 (CK2α').

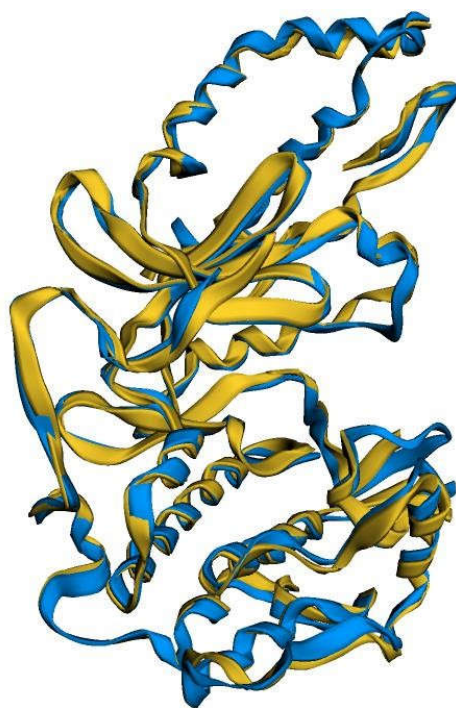

**Figure S2. The structural alignment of ROCK1 and ROCK2.** The structures were aligned using FATCAT program (<https://fatcat.godziklab.org/>). PDB IDs: 6E9W (ROCK1), 7JOV (ROCK2).
